# Supplementary material for: An altered cell-specific subcellular distribution of translesion synthesis DNA polymerase kappa (POLK) in aging neurons
Source: eLife journal article supplement (doi:10.7554/elife.101533), 2024-11-08
Supplement: fig1-data1 [file Figure 1_Source Data 1.pdf › Figure 1_Source Data 1.pdf]

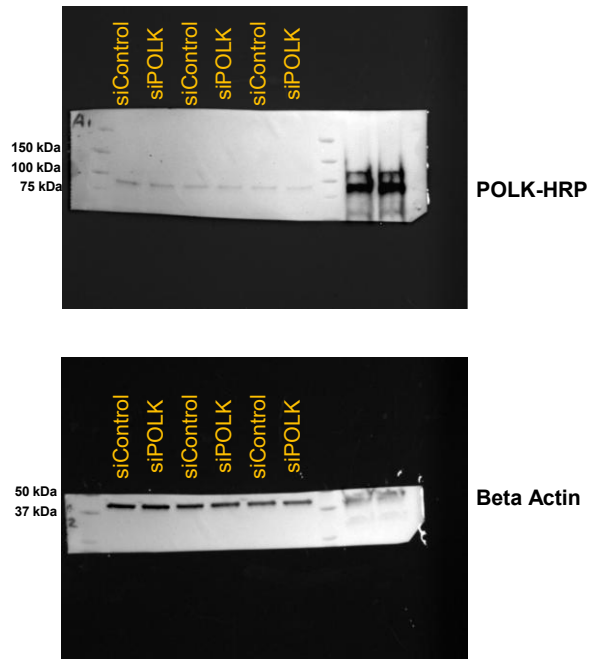

**Figure 1, Source Data 1.** Original blots corresponding to Figure 1, panel A2. POLK–HRP and Beta-actin blots, including molecular weight markers (Dual Color Standards; Bio-Rad, Cat. #1610374), from whole-cell lysates of mouse primary cortical neuronal cultures treated with siControl and siPOLK.
