# Supplementary material for: An altered cell-specific subcellular distribution of translesion synthesis DNA polymerase kappa (POLK) in aging neurons
Source: eLife journal article supplement (doi:10.7554/elife.101533), 2024-11-08
Supplement: fig1-figsupp1-data1 [file Figure 1-figure supplement 1-source data 1.pdf › Figure 1-figure supplement 1-source data 1.pdf]

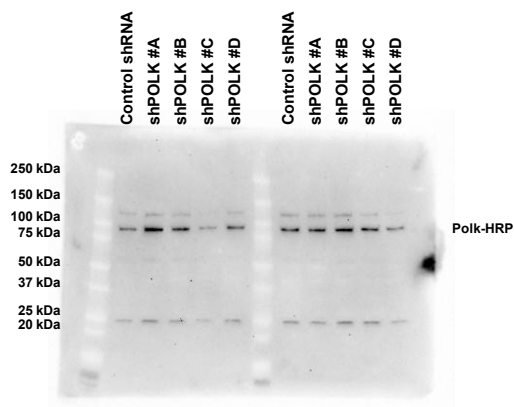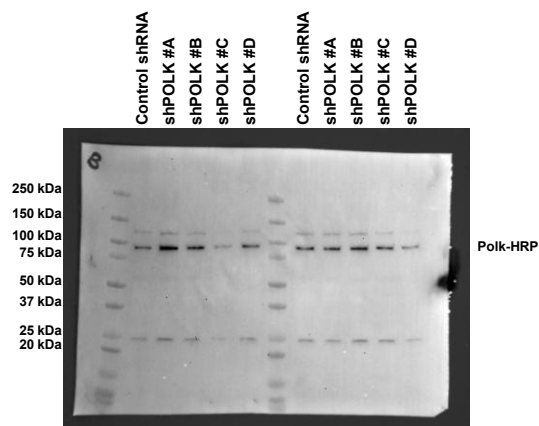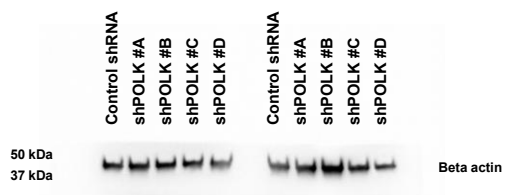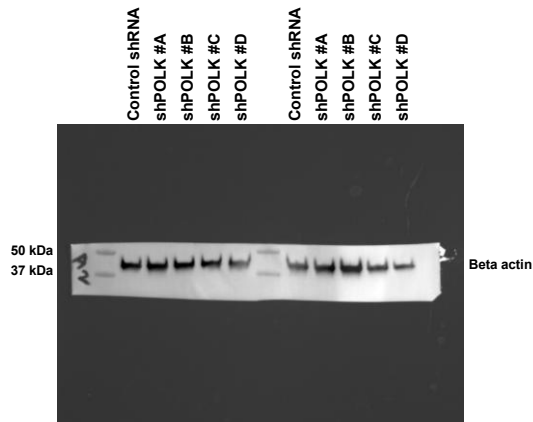

**Figure 1-figure supplement 1- source data 1.** Original blots corresponding to Figure 1-figure supplement 1, panel C. POLK-HRP and Beta actin blots, including molecular weight markers (Dual Color Standards; Bio-Rad, Cat. #1610374), from whole-cell lysates of mouse primary cortical neurons treated with four individual shPolk lentiviruses.

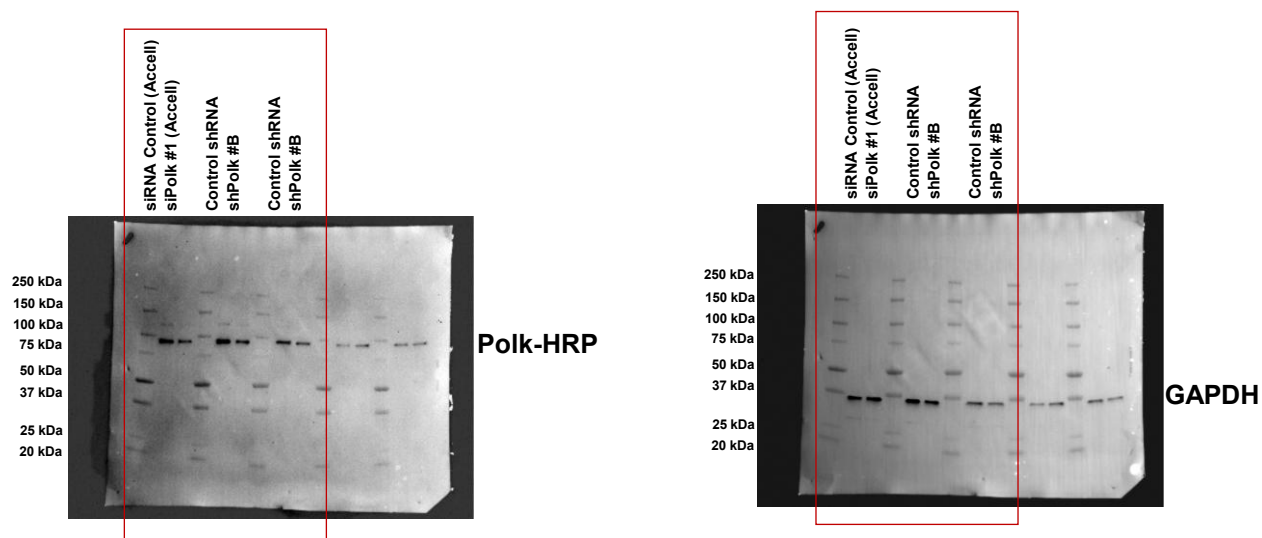

**Figure 1-figure supplement 1- source data 1.** Original blots corresponding to Figure 1-figure supplement 1, panel D. POLK-HRP and GAPDH blots, including molecular weight markers (Dual Color Standards; Bio-Rad, Cat. #1610374), from whole-cell lysates of mouse Neuro-2A cells treated with either siPolk or shPolk lentivirus.

## Low Exposure blots

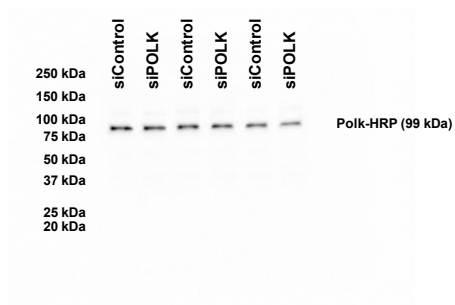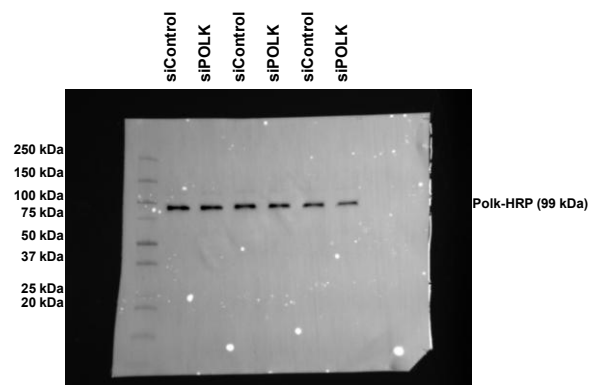

## High Exposure blots

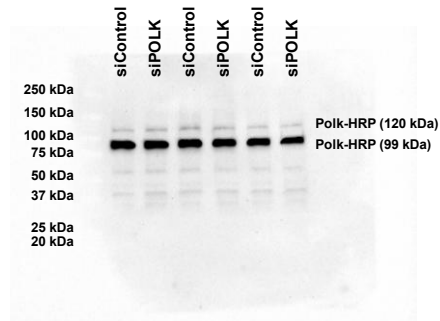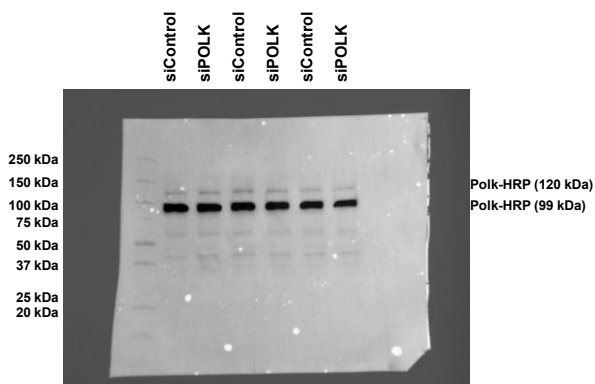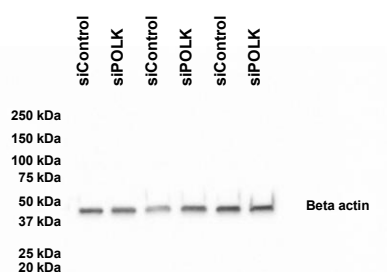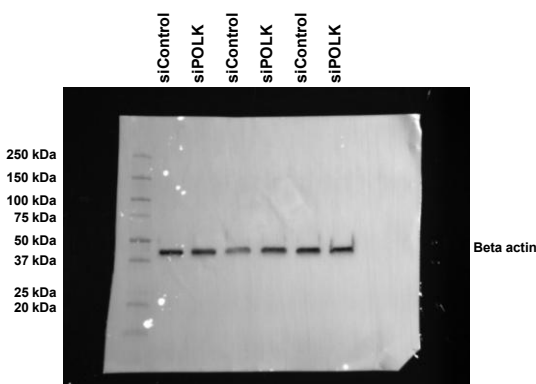

**Figure 1-figure supplement 1- source data 1.** Original blots corresponding to Figure 1-figure supplement 1, panel E. POLK-HRP (high- and low-exposure blots) and  $\beta$ -actin blots, including molecular weight markers (Dual Color Standards; Bio-Rad, Cat. #1610374), from whole-cell lysates of 4T1 cells treated with siControl and siPolk.

Mouse whole brain without cerebellum samples

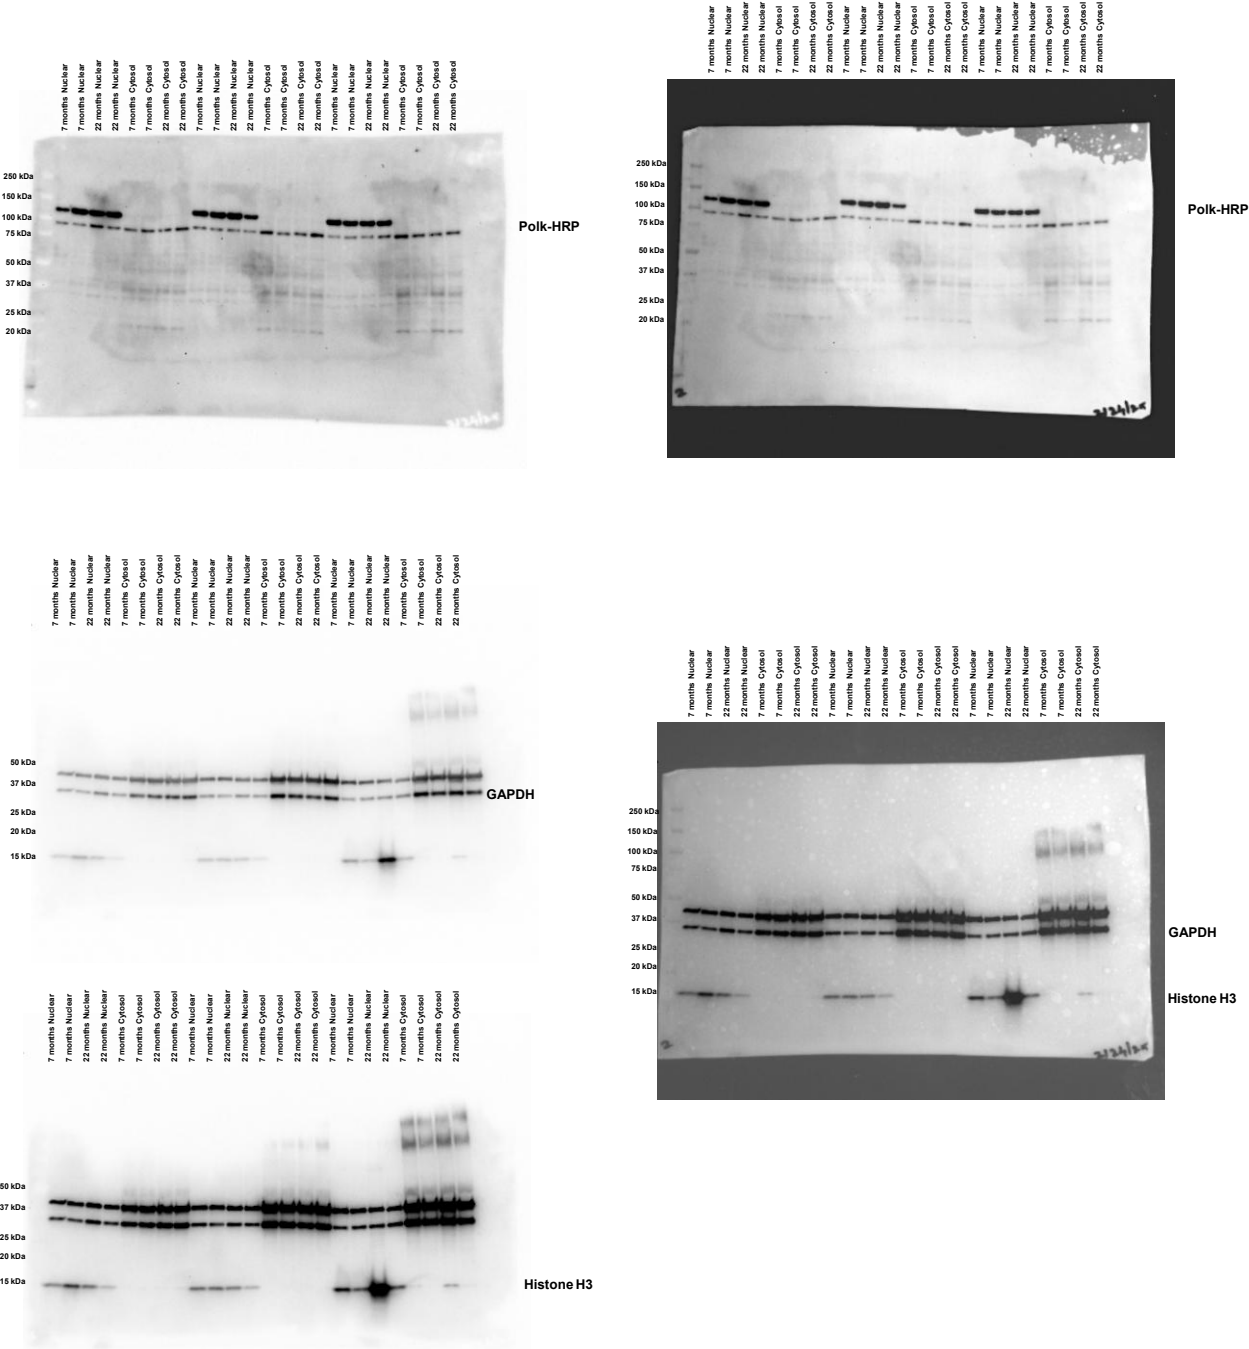

**Figure 1-figure supplement 1- source data 1.** Original blots corresponding to Figure 1-figure supplement 1, panel G. POLK–HRP, GAPDH, and histone H3 blots, including molecular weight markers (Dual Color Standards; Bio-Rad, Cat. #1610374), from nuclear and cytosolic fractions of whole mouse brain samples (cerebellum excluded).
